# Supplementary material
Source: PubMed Central journal article supplement (PMC4491292)

**Supplementary Figure S1: Risk of death for females across levels of BMI and FTI.**

Contour plot of the estimated probability of death in the next year as a joint function of BMI and FTI for female patients. Estimates of the joint effects are shown in a region with sufficient data decided by posterior standard deviations. FTI: fat tissue index; BMI: body mass index.

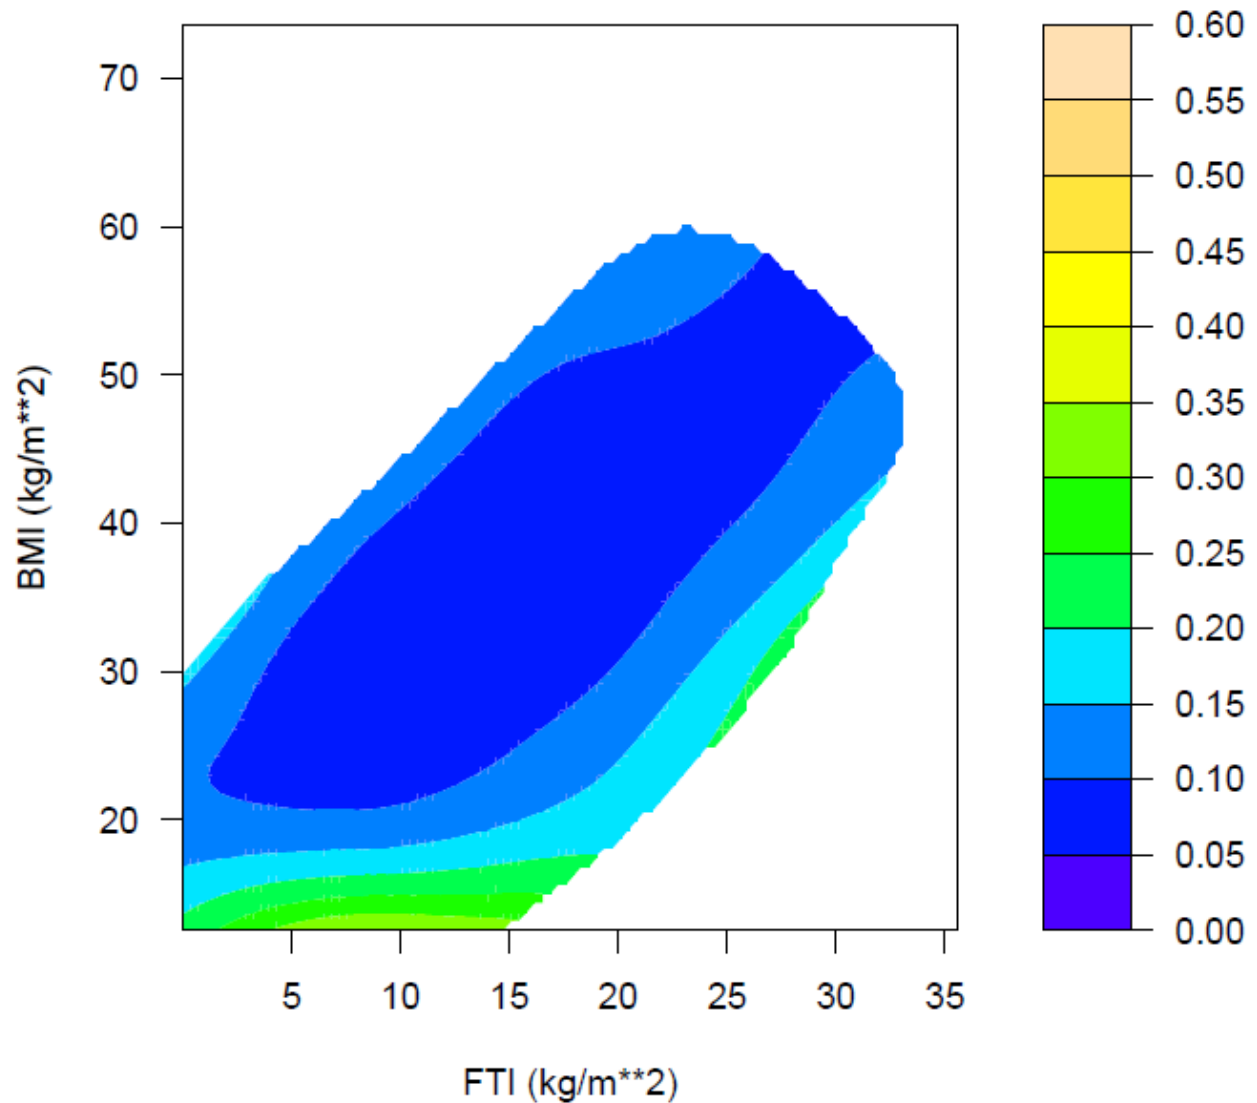

**Supplementary Figure S2: Risk of death for males across levels of BMI and FTI.**

Contour plot of the estimated probability of death in the next year as a joint function of BMI and FTI for male patients. Estimates of the joint effects are shown in a region with sufficient data decided by posterior standard deviations. FTI: fat tissue index; BMI: body mass index.

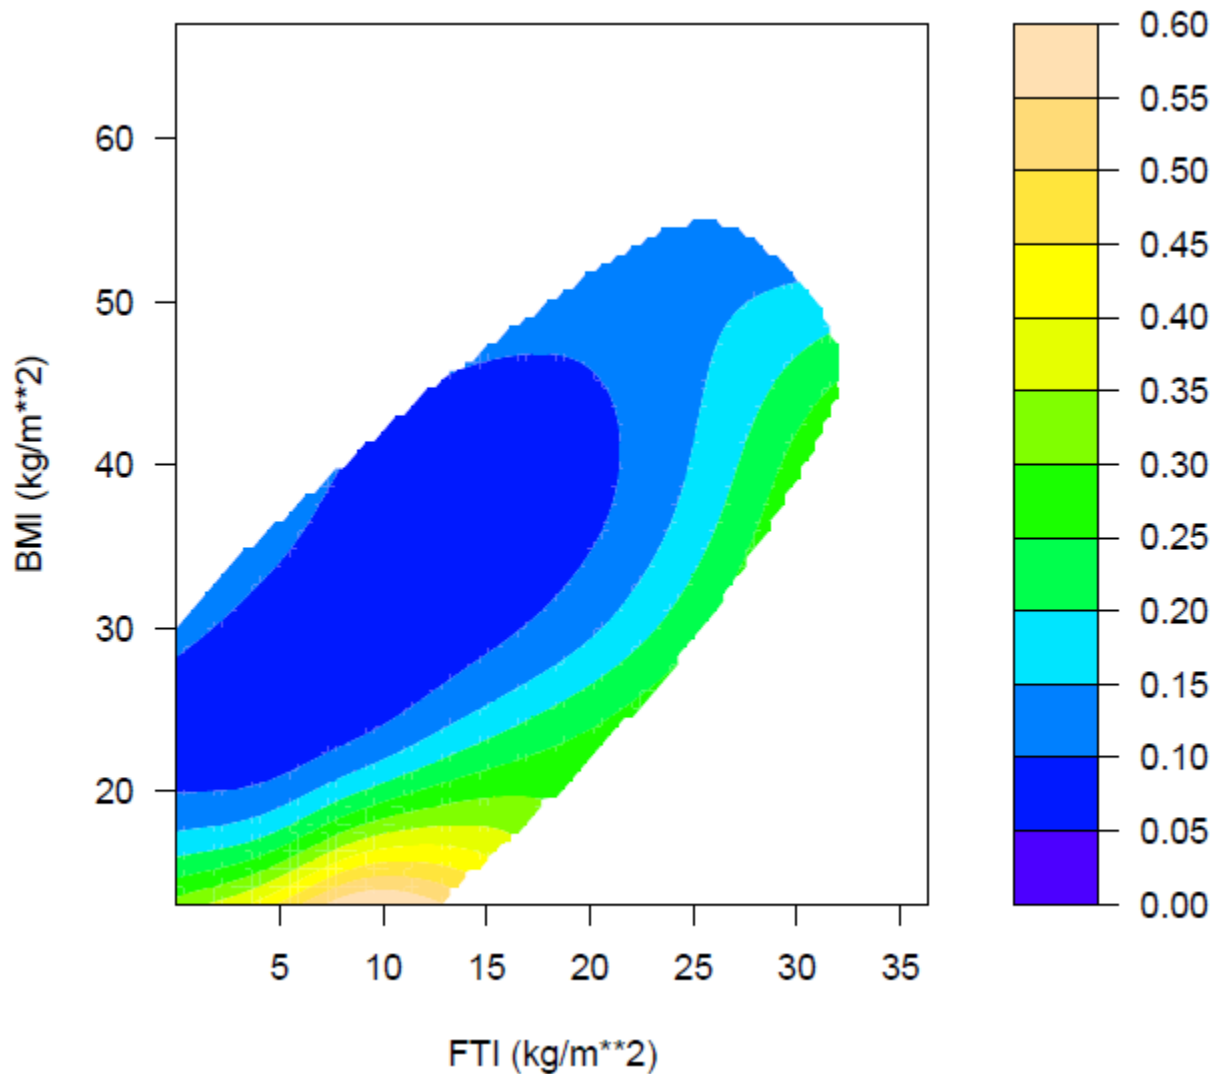

Supplement: CJN.08550814_CJN08550814SupplementaryData.pdf [file CJN.08550814_CJN08550814SupplementaryData.pdf]
